# Supplementary material for: Development of a temporary marker for peptidesElectronic supplementary information (ESI) available: IR, UV, 1H NMR and 13C NMR spectra of compounds 2a–i, 3b–h, 4b–h, 5, 6c and h, 7h, 8–12, 13c and h, and 14. See http://www.rsc.org/suppdata/ob/b2/b212470j/
Source: Royal Society of Chemistry journal article supplement (doi:10.1039/b212470j), 2003-03-31
Supplement: b212470j.doc [file b212470j.doc]

Supplementary Material for Organic & Biomolecular Chemistry

This journal is © The Royal Society of Chemistry 2003

# **Supplementary data**

# Development of a temporary marker for peptides

***N*-{3-[(*N,N*-Dimethylaminophenyl)-4'-diazenyl]-benzoyl}-proline methyl ester 2a**

**max(MeOH)/nm 415 (/dm3 mol1 cm1 17 000); **max(KBr 1%)/cm1 3421, 2927, 2856, 1739, 1632, 1602, 1517, 1442, 1406, 1365,1142 and 1112; ** (300 MHz; CDCl3; Me4Si) 1.88-2.12 (4 H, m,  and -CH2), 3.10 (6 H, s, NMe2), 3.58-3.79 (2 H, m, -CH2), 3.81 (3 H, s, OMe), 4.68-4.74 (1 H, m, -CH), 6.76 (2 H, d *J* 9, 2  Ar-H *ortho* NMe2), 7.52 (1H, t *J* 7.8, 5-H), 7.59 (1 H, d *J* 7.8, 4 or 6-H), 7.89 (3 H, d *J* 9, 2  Ar-H *meta* NMe2 and 6 or 4-H), 8.05 (1 H, s, 2-H); **C (75.4 MHz; CDCl3; Me4Si) 25.3 (-CH2), 29.4 (-CH2), 40.2 (NMe2), 49.9 (-CH2), 52.2 (OMe), 59.1 (-CH), 111.4 (C-2' and C-6'), 120.8 (C-2 and C-4), 125.1 (C-3' and C-5'), 128.0 (C-5), 128.4 (C-6), 136.9 (C-1), 143.4 (C-4'), 152.6 (C-3), 152.8 (C-1'), 169.2 (CONH), 172.7 (*C*O2Me). The assignments were supported by the DEPT 135 technique.

***N*-{3-[(*N,N*-Dimethylaminophenyl)-4'-diazenyl]-benzoyl}-glycine methyl ester 2b**

**max(MeOH)/nm 415 (/dm3 mol1 cm1 24 468); **max(KBr 1%)/cm1 3294, 2921, 1748, 1642, 1603, 1520, 1405, 1368, 1333, 1242 and 1150; **H (300 MHz; CDCl3; Me4Si) 3.12 (6 H, s, NMe2), 3.83 (3 H, s, OMe), 4.30 (2 H, d *J* 5.1, CH2), 6.78 (2 H, d *J* 9.6, 2  Ar-H *ortho* NMe2), 6.83 (1 H, br s, NH), 7.56 (1 H, t *J* 7.8, 5-H), 7.86-7.93 (3 H, d *J* 9.6, 2  Ar-H *ortho* NMe2 and 4 or 6-H), 8.0 (2 H, dt *J* 8.1 and 1.2, 4 or 6-H), 8.23 (1 H, tap *J* 2.1, 2-H);**C (75.4 MHz; CDCl3; Me4Si) 40.2 (NMe2), 41.7 (CH2), 52.4 (OMe), 111.4 (C-2' and C-6'), 120.2 (C-2), 125.2 (C-3' and C-5'), 125.5 (C-4), 127.9 (C-5), 129.3 (C-6), 134.4 (C-1), 143.3 (C-4'), 152.6 (C-3), 153.0 (C-1'), 167.1 (CONH), 170.4 (*C*O2Me). The assignments were supported by the Dept 135 technique.

***N*-{3-[(*N,N*-Dimethylaminophenyl)-4'-diazenyl]-benzoyl}-alanine methyl ester 2c**

**max(MeOH)/nm 415 (/dm3 mol1 cm1 28 453); **max(KBr 1%)/cm1 3282, 2921, 1752, 1637, 1605, 1538, 1442, 1398, 1372, 1344, 1202, 1150, 1109 and 1066; **H (300 MHz; CDCl3; Me4Si) 1.57 (3 H, d *J* 7.5, CH3), 3.12 (6 H, s, NMe2), 3.82 (3 H, s, OMe), 4.80-4.85 (1H, m, -CH), 6.79 (2 H, d *J* 9.3, 2  Ar-H *ortho* NMe2), 6.85 (1 H, d *J* 7.2, NH), 7.57 (1 H, t *J* 7.8, 5-H), 7.86-7.94 (3 H, m, 2  Ar-H *meta* NMe2 and 4 or 6-H), 8.0 (1 H, dt *J* 8.7 and 1.2, 6 or 4-H), 8.22 (1 H, t *J* 1.8, 2-H); **C (75.4 MHz; CDCl3) 18.5 (CH3), 40.2 (NMe2), 48.5 (-CH), 52.4 (OMe), 111.4 (C-2' and C-6'), 120.2 (C-2), 125.1 (C-3' and C-5'), 125.3 (C-4), 128.0 (C-5), 129.2 (C-6), 134.7 (C-1), 143.3 (C-4'), 152.6 (C-3), 153.1 (C-1'), 166.4 (CONH), 173.5 (*C*O2Me). The assignments were supported by the Dept 45 technique.

***N*-{3-[(*N,N*-Dimethylaminophenyl)-4'-diazenyl]-benzoyl}-valine methyl ester 2d**

**max(MeOH)/nm 415 (/dm3 mol1 cm1 18 735); **max(KBr 1%)/cm1 3299, 2928, 1742, 1643, 1604, 1558, 1534, 1522, 1434, 1405, 1371, 1200 and 1150; **H (300 MHz; CDCl3; Me4Si) 1.04 (6 H, t *J* 5.7, 2  CH3), 2.23-2.37 (1 H, m, -CH), 3.12 (6 H, s, NMe2), 3.80 (3 H, s, OMe), 4.80-4.86 (1 H, m, -CH), 6.73 (1 H, s, NH), 6.79 (2 H, d *J* 9.6, 2  Ar-H *ortho* NMe2), 7.57 (1 H, t *J* 7.5, 5-H), 7.86-7.93 (3 H, m, 2  Ar-H *meta* NMe2 and 4 or 6-H), 8.0 (1 H, dt *J* 8.1, 1.2, 6 or 4-H), 8.23 (1 H, tap *J* 2.1, 2-H); **C (75.4 MHz; CDCl3; Me4Si) 18.0 (-CH3), 19.0 (-CH3), 31.7 (-C), 40.2 (NMe2), 59.2 (OMe), 57.5 (-C), 111.4 (C-2' and C-6'), 120.6 (C-2), 125.0 (C-4), 125.2 (C-3' and C-5'), 128.0 (C-5), 129.3 (C-6), 135.0 (C-1), 143.4 (C-4'), 152.7 (C-3), 153.2 (C-1'), 166.9 (CONH), 172.5 (*C*O2Me). The assignments were supported by the Dept 45 technique.

***N*-{3-[(*N,N*-Dimethylaminophenyl)-4'-diazenyl]-benzoyl}-isoleucine methyl ester 2e**

**max(MeOH)/nm 415 (/dm3 mol1 cm1 24 158); **max(KBr 1%)/cm1 3443, 2924, 1745, 1636, 1605, 1522, 1457, 1372 and 1150; **H (300 MHz; CDCl3; Me4Si) 0.90 (3 H, m, -CH3), 1.0 (3 H, dd *J* 7.8 and 1.8, -CH3), 1.20-1.38 (2 H, m, -CH2), 2.0-2.05 (1 H, m, -CH), 3.12 (6 H, s, NMe2), 3.80 (3 H, s, OMe), 4.92-4,95 (2 H, m, -CH and NH), 6.78 (2 H, d *J* 9.0, 2  Ar-H *ortho* NMe2), 7.60 (1 H, t *J* 7.0, 5-H), 7.84-7.90 (1 H, m, 4 or 6-H), 7.92 (2 H, d *J* 9.0, 2  Ar-H *meta* NMe2), 8.0 (1 H, d *J* 8.0, 6 or 4-H), 8.20 (1 H, s, 2-H); **C (75.4 MHz; CDCl3; Me4Si) 11.6 (-C H3), 15.5 (-CH3), 25.4 (-CH2 ), 38.3 (-CH), 40.3 (NMe2), 52.2 (OMe), 56.9 (-CH), 111.5 (C-2' and C-6'), 120.6 (C-2), 125.0 (C-4), 125.2 (C-3' and C-5'), 128.0 (C-5), 129.0 (C-6), 135.0 (C-1), 143.4 (C-4'), 152.7 (C-3), 153.2 (C-1'), 166.7 (CONH), 172.5 (*C*O2Me). The assignments were supported by the Dept 135 technique.

***N*-{3-[(*N,N*-Dimethylaminophenyl)-4'-diazenyl]-benzoyl}-leucine methyl ester 2f**

**max(MeOH)/nm 415 (/dm3 mol1 cm1 26 308); **max(KBr 1%)/cm1 3412, 2943, 2921, 1741, 1638, 1602, 1545, 1442, 1404, 1365, 1153 and 1115; **H (300 MHz; CDCl3; Me4Si) 0.80- 0.97 (6 H, m, 2  CH3), 1.50-1.90 (3 H, m, CH2 and -CH), 3.07 (6 H, s, NMe2), 3.34 (3 H, s, OMe), 4.48-4.55 (1 H, m, -CH), 6.84 (2 H, d *J* 9.3, 2  Ar-H *ortho* NMe2), 7.62 (1 H, t *J* 7.5, 5-H), 7.86 (2 H, d *J* 9.3, 2  Ar-H *meta* NMe2), 7.92 (2 H, d *J* 7.5, 4 and 6-H), 8.27 (1 H, tap *J* 1.8, 2-H), 8.94 (1 H, d *J* 7.5, NH); **C (75.4 MHz; CDCl3; Me4Si) 22.0 (CH3), 22.8 (CH3), 24.9 (-CH), 40.2 (NMe2), 41.8 (CH2), 51.2 (-CH), 52.3 (OMe), 111.4 (C-2' and C-6'), 120.3 (C-2), 125.0 (C-4), 125.2 (C-3' and C-5'), 128.0 (C-5), 129.3 (C-6), 134.7 (C-1), 143.4 (C-4'), 152.6 (C-3), 153.1 (C-1'), 166.7 (CONH), 173.5 (*C*O2Me). The assignments were supported by the Dept 135 technique.

***N*-{3-[(*N,N*-Dimethylaminophenyl)-4'-diazenyl]-benzoyl}-methionine methyl ester 2g**

**max(MeOH)/nm 415 (/dm3 mol1 cm1 33 145); **max(KBr 1%)/cm13307, 2922, 2845, 1739, 1632, 1605, 1572, 1531, 1443, 1404, 1366, 1305, 1278, 1229, 1210, 1174, 1151, 1120, 1104, 1066, 989, 957, 822 and 755 ;**H (300 MHz; CDCl3; Me4Si) 2.14-2.20 (3 H, m, S-CH3), 2.25-2.40 (2 H, m, -CH2), 2.58-2,68 (2 H, m, -CH2), 3.11 (6H, s, NMe2), 3.82 (3 H, s, OMe), 4.90-5.02 (1 H, m, -CH), 6.77 (2 H, d *J* 9.3, 2  Ar-H *ortho* NMe2), 7.07 (1 H, d *J* 8.1, NH), 7.57 (1 H, t *J* 7.8, 5-H), 7.82 (2 H, m, 2  Ar-H *meta* NMe2), 7.92 (2 H, dt *J* 8.1, 1.5, 4 and 6-H), 8.24 (1 H, tap *J* 1.8, 2-H); **C (75.4 MHz; CDCl3; Me4Si) 15.5 (S-CH3), 30.1 (-CH2), 31.6 (-CH2), 40.2 (NMe2), 52.1 (OMe), 52.6 (-CH), 111.4 (C-2' and C-6'), 120.3 (C-2), 125.2 (C-3' and C-5'), 125.4 (C-4), 127.9 (C-5), 129.3 (C-6), 134.5 (C-1), 143.3 (C-4'), 152.6 (C-3), 153.1 (C-1'), 166.7 (CONH), 172.4 (*C*O2Me). The assignments were supported by the Dept 135 technique.

***N*-{3-[(*N,N*-Dimethylaminophenyl)-4'-diazenyl]-benzoyl}-phenylalanine ethyl ester 2h**

**max(MeOH)/nm 415 (/dm3 mol1 cm1 30 773); **max(KBr 1%)/cm1 3319, 2928, 1755, 1605, 1526, 1445, 1405, 1369, 1305, 1212 and 1156; **H (300 MHz; CDCl3; Me4Si) 1.29 (3 H, t *J* 7.5, OCH2*CH3*), 3.12 (6 H, s, NMe2), 3.30 (2 H, t *J* 3.9, -CH2), 4.09 (2 H, q *J* 7.5, O*CH2*CH3), 4.60-4.65 (1 H, m, -CH), 6.72 (1 H, d *J* 7.5, NH) 6.80 (2 H, d *J* 9.0, 2  Ar-H *ortho* NMe2), 7.19 (2 H, dd *J* 7.5, 1.8 and 2  Ar-H Phe), 7.27-7.60 (3 H, m, 3  Ar-H Phe), 7.54 (1 H, d *J* 7.8, 5-H), 7.79 (1 H, dt *J* 8.1 and 2.7, 4 or 6-H), 7.92 (2 H, d *J* 9.0, 2  Ar-H *meta* NMe2), 7.99 (1 H, dd *J* 8.7 and 1.2, 6 or 4-H), 8.17 (1 H, tap *J* 1.8, 2-H);**C (75.4 MHz; CDCl3; Me4Si) 14.1 (OCH2*C*H3), 38.0 (-CH2), 40.3 (NMe2), 53.0 (-CH), 61.6 (O*C*H2CH3), 111.5 (C-2' and C-6'), 120.3 (C-2), 125.2 (C-3' and C-5'), 125.4 (C-4), 127.1 (C-4''), 127.9 (C-5), 128.6 (C-3'' and C-5"), 129.3 (C-6), 129.4 (C-2'' and C-6''), 134.8 (C-1), 135.9 (C-1''), 143.4 (C-4'), 152.7 (C-3), 153.2 (C-1'), 166.5 (CONH), 171.5 (*C*O2CH2CH3). The assignments were supported by the Dept 135 technique.

***N*-{3-[(*N,N*-Dimethylaminophenyl)-4'-diazenyl]-benzoyl}-phenylalanyl-valine *tert*-butyl ester 2i**

**max(MeOH)/nm 419 (/dm3 mol1 cm1 27 648); **H (300 MHz; CDCl3; Me4Si) 0.85-0.90 (6 H, m, 2 CH3 Val), 1.47 (9 H, s, OC(CH3)2), 2.02-2.18 (1 H, m, -CH Val), 3.20-3.27 (2 H, m, -CH2 Phe), 4.35 and 4.38 (1 H, 2 d *J* 4.8 and 4.5, -CH Val), 4.90-4.96 (1 H, m, -CH Phe), 6.33 (1 H, d *J* 8.4, NH Val), 6.78 (2 H, d *J* 7.5, 2 Ar-H *ortho* N(CH3)2), 6.93 (1 H, d *J* 7.2, NH Phe), 7.20-7.35 (5 H, m, Ar-H Phe), 7.54 (1 H, t *J* 7.8, 5-H), 7.80 (1 H, dd *J* 7.5 and 1.2, 4-H or 6-H), 7.91 (2 H, d *J* 7.5, 2 Ar-H *meta* N(CH3)2), 7.98 (1 H, dd *J* 7.5 and 1.0, 6-H or 4-H), 8.16 (1 H, tap *J* 1.8, 2-H). The assignments were supported by spin decoupling-double ressonance. **C (300 MHz; CDCl3; Me4Si) 17.7 (CH3 Val), 18.8 (CH3 Val), 28.0 (*C*(CH3)3), 31.2 (CH Val), 37.3 (CH2 Phe), 40.2 (N(*C*H3)2), 54.8 (**-**CH Phe), 57.7 (**-**CH Val), 81.9 (OC(*C*H3)3), 111.4 (C-2' and C-6’), 120.5 (C-2), 125.2 (C-3’ and C-5’), 125.3 (C-4), 127.0 (C-4’’), 127.9 (C-5), 128.6 (C-3’’ and C-5’’), 129.2 (C-6), 129.4 (C-2’’ and C-6’’), 134.6 (C-1), 136.4 (C-1’’), 143.3 (C-4’), 152.6 (C-3), 153.1 (C-1’), 166.8 (CONH), 170.3 (CONH), 170.6 (*C*O2C(CH3)3). The assignments were supported by the DEPT 135 technique.

***N*-{3-[(*N,N*-Dimethylaminophenyl)-4'-diazenyl]-benzoyl}-*N-tert*-butyloxycarbonyl-glycine methyl ester 3b**

**max(MeOH)/nm 418 (/dm3 mol1 cm1 22 364); **max(oil)/cm12924, 2498, 1756, 1737, 1672, 1603, 1517, 1461, 1405, 1358, 1223 and 1146; **H (300 MHz; CDCl3; Me4Si) 1.16 (9 H, s, CMe3), 3.10 (6 H, s, NMe2), 3.81 (3 H, s, OMe), 4.60 (2 H, s, CH2), 6.75 (2 H, d *J* 9.0, 2 Ar-H *ortho* NMe2), 7.53 (1 H, t *J* 7.8, 5-H), 7.66 (1 H, dt *J* 8.0 and 1.5, 4 or 6-H), 7.89 (2 H, dt *J* 9.0, 2  Ar-H *meta* NMe2), 7.98 (1 H, dt *J* 8.7 and 1.5, 6 or 4-H), 8.08 (1 H, tap *J* 1.5, 2-H);**C (75.4 MHz; CDCl3; Me4Si) 27.3 (C*Me3*), 40.2 (NMe2), 46.3 (OMe), 52.3 (CH2), 83.9 (*C*Me3), 111.4 (C-2' and C-6'), 120.9 (C-2), 125.1 (C-3' and C-5'), 125.5 (C-4), 128.3 (C-5), 128.7 (C-6), 137.7 (C-1), 143.3 (C-4'), 152.4 (C-3 and C-1'), 152.5 (C-1'), 152.6 (*C*O2CMe3), 169.3 (CONH), 172.4 (*C*O2Me). The assignments were supported by the Dept 135 technique.

***N*-{3-[(*N,N*-Dimethylaminophenyl)-4'-diazenyl]-benzoyl}-*N-tert*-butyloxycarbonyl-alanine methyl ester 3c**

**max(MeOH)/nm 450 (/dm3 mol1 cm1 17 282); **max(neat)/cm1 2976, 2929, 2856, 1747, 1732, 1681, 1602, 1562, 1520, 1446, 1398, 1367, 1311, 1255, 1197, 1148, 1066, 1039, 946, 902, 848, 823 and 750; **H (300 MHz; CDCl3; Me4Si) 1.16 (9 H, s, CMe3), 1.68 (3 H, d *J* 7.0, CH3), 3.12 (6 H, s, NMe2), 3.80 (3 H, s, OMe), 5.12-5.24 (1 H, m, -CH ), 6.77 (2 H, d *J* 9.3, 2 Ar-H *ortho* NMe2), 7.53 (1 H, t *J* 7.8, 5-H), 7.63 (1 H, dt *J* 7.0 and 1.2, 4 or 6-H), 7.90 (2 H, d *J* 9.3, 2 Ar-H *meta* NMe2), 7.99 (1 H, dt *J* 7.8 and 1.2, 6 or 4-H), 8.06 (1 H, tap *J* 1.8, 2-H); **C (75.4 MHz; CDCl3; Me4Si) 15.2 (CH3), 27.3 (C*Me3*), 40.2 (NMe2), 52.4 (-CH), 53.5 (OMe), 83.8 *C*Me3), 111.4 (C-2' and C-6'), 120.9 (C-2), 125.1 (C-3' and C-5'), 125.4 (C-4), 128.1 (C-5), 128.8 (C-6), 138.1 (C-1), 143.3 (C-4'), 152.4 (C-3), 152.6 (C-1' and *C*O2CMe3), 171.4 (CONH), 172.3 (*C*O2Me). The assignments were supported by the Dept 135 technique.

***N*-{3-[(*N,N*-Dimethylaminophenyl)-4'-diazenyl]-benzoyl}-*N-tert*-butyloxycarbonyl-valine methyl ester 3d**

**max(MeOH)/nm 419 (/dm3 mol1 cm1 7 723); **max(neat)/cm12983, 1731, 1682, 1601,1520, 1455, 1360, 1251, 1147, 1115, 1053, 946, 842 and 824; **H (300 MHz; CDCl3; Me4Si) 1.02 (3 H, d *J* 6.9, -CH3), 1.25 (3 H, d *J* 6.6, -CH3), 2.60-2.80 (1 H, m, -CH), 3.09 (6 H, s, NMe2), 3.78 (3 H, s, OMe), 4.75 (1 H, d *J* 9.3, -CH), 6.75 (2 H, d *J* 9.3, 2 Ar-H *ortho* NMe2), 7.52 (1 H, t *J* 7.8, 5-H), 7.62 (2 H, d *J* 7.8, 4 or 6-H), 7.88 (2 H, d *J* 8.7, 2 Ar-H *meta* NMe2), 7.98 (1 H, d *J* 8.7, 6 or 4-H), 8.07 (1 H, s, 2-H); **C (75.4 MHz; CDCl3; Me4Si) 19.3 (-CH3), 22.0 (-CH3), 27.3 (C*Me3*) 28.4 (-CH), 40.2 (NMe2), 52.1 (OMe), 63.1 (-CH), 83.7 (*C*Me3), 111.4 (C-2' and C-6'), 120.7 (C-2), 125.1 (C-3' and C-5'), 125.4 (C-4), 128.1 (C-5), 128.8 (C-6), 137.9 (C-1), 143.4 (C-4'), 152.6 (C-3 and C-1'), 153.0 (*C*O2CMe3), 170.7 (CONH), 172.4 (*C*O2Me). The assignments were supported by the Dept 135 technique.

***N*-{3-[(*N,N*-Dimethylaminophenyl)-4'-diazenyl]-benzoyl}-*N-tert*-butyloxycarbonyl-isoleucine methyl ester 3e**

**max(MeOH)/nm 470 (/dm3 mol1 cm1 9 896); **max(neat)/cm12744, 1747, 1732, 1601, 1520, 1446, 1368, 1236 and 1149; **H (300 MHz; CDCl3; Me4Si) 0.93 (3 H, t *J* 7.4,*-*CH3), 1.16 (9 H, s, C*Me3*), 1.20 (3 H, dd *J* 7.0, 1.8, -CH3), 1.40-1.60 (2 H, m, -CH2), 2.40-2.50 (1 H, m, -CH), 3.10 (6 H, s, NMe2), 3.78 (3 H, s, OMe), 4.81 (1 H, d *J* 9.3, -CH), 6.77 (2 H, d *J* 9.0, 2 Ar-H *ortho* NMe2), 7.50 (1 H, t *J* 7.5, 5-H), 7.60 (1 H, d *J* 7.0, 4 or 6-H), 7.80 (2 H, d *J* 9.0, 2 Ar-H *meta* NMe2), 7.98 (1 H, d *J* 7.0, 6 or 4-H), 8.06 (1 H, tap *J* 1.5 , 2-H); **C (75.4 MHz; Me4Si) 10.8 -CH3), 17.7 (-CH3), 25.2 (-CH2), 27.4 (C*Me3*), 34.1(-CH), 40.2 (NMe2), 52.2 (OMe), 62.5 (-CH), 83.7 (*C*Me3), 111.4 (C-2' and C-6'), 120.7 (C-2), 125.1 (C-3' and C-5'), 125.5 (C-4), 128.1 (C-5), 128.7 (C-6), 137.9 (C-1), 143.3 (C-4'), 152.6 (C-3 and C-1'), 153.0 (*C*O2CMe3), 170.8 (CONH), 172.4 (*C*O2Me). The assignments were supported by the Dept 135 technique.

***N*-{3-[(*N,N*-Dimethylaminophenyl)-4'-diazenyl]-benzoyl}-*N-tert*-butyloxycarbonyl-leucine methyl ester 3f**

**max(MeOH)/nm 450 (/dm3 mol1 cm1 15 649); **max(neat)/cm1 2929, 1747, 1732, 1682, 1601, 1520, 1455, 1360, 1262, 1216, 1150, 1060, 1008, 946, 852, 823 and 756; **H (300 MHz; CDCl3; Me4Si) 1.01 (3 H, d *J* 6.6, CH3), 1.05 (3 H, d *J* 6.6, CH3), 1,18 (9 H, s, C*Me*3), 1.68-2.00 (3H, 2 m, CH2 and -CH), 3.10 (6H, s, NMe2), 3.80 (3H, s, OMe), 5.17-5.24 (1 H, m, -CH), 6.77 (2 H, d *J* 9.0, 2 Ar-H *ortho* NMe2), 7.53 (1 H, d *J* 7.8, 5-H), 7.64 (1 H, d *J* 8.1, 4 or 6-H), 7.90 (2 H, d *J* 9.0, 2 Ar-H *meta* NMe2), 8.02 (1 H, d *J* 8.1, 6 or 4-H), 8.10 (1 H, tap *J* 1.8, 2-H); **C (75.4 MHz; CDCl3; Me4Si) 21.5 (CH3), 22.6 (CH3), 25.2 (-CH), 27.3 (C*Me3*), 38.0 (CH2), 40.2 (NMe2), 52.3 (-CH), 56.3 (OMe), 83.6 (*C*Me3), 111.4 (C-2' and C-6'), 121.0 (C-2), 125.1 (C-3' and C-5'), 125.3 (C-4), 128.1 (C-5), 128.7 (C-6), 138.1 (C-1), 143.4 (C-4'), 152.6 (C-3), 152.7 (C-1'), 152.9 (*C*O2CMe3), 171.5 (CONH), 172.3 (*C*O2Me). The assignments were supported by the DEPT 135 technique.

***N*-{3-[(*N,N*-Dimethylaminophenyl)-4'-diazenyl]-benzoyl}-*N-tert*-butyloxycarbonyl-methionine methyl ester 3g**

**max(MeOH)/nm 420 (/dm3 mol1 cm1 24 589); **max(neat)/cm12886, 1741, 1732, 1682, 1600, 1520, 1442, 1365, 1256, 1150, 1071, 940, 902, 848, 823, 736; H (300 MHz; CDCl3; Me4Si) 1.16 (9 H, s, C*Me*3), 2.13 (3 H, s, S-CH3), 2.24-2.40 and 2.50-2.65 (4 H, 2 m, -CH2 and CH2), 3.09 (6 H, s, NMe2), 3.80 (3 H, s, OMe), 5.26-5.29 (1 H, m, -CH), 6.75 (2 H, d *J* 9, 2  Ar-H *ortho* NMe2), 7.53 (1 H, t *J* 7.5, 5-H), 7.63 (1 H, t *J* 7.6, 4 or 6-H), 7.88 (2 H, d *J* 9, 2 Ar-H *meta* NMe2), 7.99 (1 H, d *J* 8.1, 6 or 4-H), 8.07 (1 H, tap *J* 1.8, 2-H); **C (75.4 MHz; CDCl3; Me4Si) 15.3 (S-CH3), 27.3 (C*Me*3), 28.9 (-CH2), 31.0 (-CH2), 40.2 (NMe2), 52.5 (OMe), 56.8 (-CH), 84.0 (*C*Me3), 111.4 (C-2' and C-6'), 120.9 (C-2), 125.2 (C-3' and C-5'), 125.6 (C-4), 128.2 (C-5), 128.8 (C-6), 137.8 (C-1), 143.3 (C-4'), 152.6 (C-3), 152.7 (C-1'), 170.8 (CONH and *C*O2CMe3), 172.4 (*C*O2Me). The assignments were supported by the DEPT 135 technique.

***N*-{3-[(*N,N*-Dimethylaminophenyl)-4'-diazenyl]-benzoyl}-*N-tert*-butyloxycarbonyl-phenylalanine ethyl ester 3h**

**max(MeOH)/nm 420 (/dm3 mol1 cm1 20 073); **max(neat)/cm1 2928, 1807, 1732, 1682, 1602, 1562, 1520, 1474, 1456, 1404, 1367, 1311, 1254, 1150, 1115, 1066, 1028, 946, 823 and 746; **H (300 MHz; CDCl3; Me4Si) 1.04 (9 H, s, C*Me3*), 1.30 (3 H, t *J* 7.0, OCH2*CH3*), 3.12 (6 H, s, NMe2), 3.42-3.62 (2 H, m, -CH2), 4,00-4.38 (2 H, m, O*CH2*CH3), 5.42-5.50 (1 H, m, -CH), 6.78 (2 H, d *J* 9.6, 2  Ar-H *ortho* NMe2), 7.14-7.30 (6 H, m, Ar-H Phe and 6 or 4-H), 7.40 (1 H, t *J* 7.5, 5-H), 7.64 (1 H, tap *J* 1.8, 2-H), 7.87 (2 H, d *J* 9.0, 2 Ar-H *meta* NMe2), 7.90-7.92 (1 H, m, 4 or 6-H); **C (75.4 MHz; CDCl3; Me4Si) 14.2 (OCH2*C*H3), 27.2 (C*Me3*), 35.4 (-CH2), 40.3 (NMe2), 58.7 (-CH), 61.6 (O*C*H2CH3), 83.5 (*C*Me3), 111.4 (C-2' and C-6'), 120.6 (C-2), 125.1 (C-3' and C-5'), 125.4 (C-4), 126.7 (C-4''), 128.0 (C-5), 128.4 (C-6), 128.5 (C-3'' and C-5"), 129.4 (C-2'' and C-6"), 137.1 (C-1), 138.1 (C-1''), 143.4 (C-4'), 152.4 (C-3), 152.5 (C-1'), 152.6 (*C*O2CMe3), 170.2 (CONH), 172.5 (*C*O2CH2CH3). The assignments were supported by the DEPT 135 technique.

***N*-*tert*-Butyloxycarbonyl-glycine methyl ester 4b**

**max(neat)/cm13375, 2978, 1752, 1716, 1521, 1439, 1387, 1368, 1284, 1251, 1211, 1168 and 1057; **H (300 MHz; CDCl3; Me4Si) 1.41 (9 H, s, CMe3), 3.70 (3 H, s, OCH3), 3.86 (2 H, d *J* 5.7, CH2), 5.2 (1 H, br s, NH); **C (75.4 MHz; CDCl3; Me4Si) 28.1 (C*Me3*) 42.1 (*C*H2), 52.1 (OMe), 79.8 (*C*Me3), 155.7 (NH*C*O2CMe3), 170.8 (*C*O2Me).

***N*-*tert*-Butyloxycarbonyl-alanine methyl ester 4c**

**max(neat)/cm1 3366, 2977, 1747, 1716, 1519, 1455, 1367, 1305, 1251, 1216, 1167, 1116, 1070 and 1026; **H (300 MHz; CDCl3; Me4Si) 1.37 (3 H, d *J* 6.9, CH3), 1.43 (9 H, s, CMe3), 3.73 (3 H, s, OMe), 4.31 (1 H, tap *J* 7.5,  CH), 5.07 1 H, br s, NH);**C (75.4 MHz; CDCl3; Me4Si) 18.3 (CH3), 28.1 (C*Me3*), 49.0 ( CH), 52.1 (OMe), 79.6 (*C*Me3), 155.0 (CONH), 173.7 (*C*O2Me).

***N*-*tert*-Butyloxycarbonyl-valine methyl ester 4d**

**max(neat)/cm1 3362, 2976, 1807, 1741, 1718, 1508, 1458, 1436, 1368, 1311, 1251 1216, 1159, 1118, 1071, 1017 and 758; **H (300 MHz; CDCl3; Me4Si) 0.88 (3 H, d *J* 6.9, CH3), 0.95 ( 3H, d *J* 6.6, CH3), 1.44 (9 H, s, CMe3), 2.04-2.09 (1 H, m, -CH), 3.73 (3 H, s, OMe), 4.20 and 4.23 (1 H, 2 d *J* 4.8, -CH), 5.03 (1 H, d *J* 9.0, NH); **C (75.4 MHz; CDCl3; Me4Si) 17.5 (CH3), 18.9 (CH3), 28.2 (C*Me3*) 31.2 (-CH), 51.9 (OMe), 58.4 (-CH), 79.6 (*C*Me3), 155.6 (CONH), 172.8 (*C*O2Me).

***N*-*tert*-Butyloxycarbonyl-isoleucine methyl ester 4e**

**max(neat)/cm1 3374, 2966, 2932, 2867, 2616, 1741, 1716, 1503, 1458, 1431, 1387, 1251, 1207, 1165, 1120, 1074, 1044 and 1017; **H (300 MHz; CDCl3; Me4Si) 0.80-0.92 (3 H, m, CH3), 1.20-1.28 (3 H, s,  -CH3), 1.40 (9 H, s, C*Me3*), 1.48 (2H, s,  -CH2), 1.80 (1H, br s, CH), 3.69 (3 H, s, OMe), 4.18-4.24 (1 H, m, -CH), 5.07 (1 H, d *J* 7.30, NH); **C (75.4 MHz; CDCl3; Me4Si) 11.5 (-CH3), 15.3 (-CH3), 24.9 ( -CH2), 28.2 (C*Me3*), 37.9 (-CH), 51.8 (OMe), 57.7 (-CH), 79.6 (*C*Me3), 155.4 (*C*O2CMe2), 172.8 (*C*O2Me). The assignments were supported by the DEPT 135 technique.

***N*-*tert*-Butyloxycarbonyl-leucine methyl ester 4f**

**max(neat)/cm1 3347, 2960, 1747, 1716, 1469, 1447, 1436, 1368, 1251, 1215, 1165, 1120, 1049, 1017, 755 and 668; **H (300 MHz; CDCl3; Me4Si) 0,90 (6 H, d *J* 6.3, 2 CH3), 1.41 (9 H, s, CMe3), 1,45-1,65 (3 H, m, CH2 and -H), 3,70 (3 H, s, OMe), 4,88 (1 H, d *J* 7.3, NH); **C (75.4 MHz; CDCl; Me4Si) 21.8 (CH3), 22.6 (CH3), 24.7 (-CH), 28.2 (C*Me3*), 41.7 (CH2), 52.0 (-CH), 52.0 (OMe), 79.7 (*C*Me3), 155.3 (CONH), 174.0 (*C*O2Me). The assignments were supported by the DEPT 135 technique.

***N*-*tert*-Butyloxycarbonyl-methionine methyl ester 4g**

**max(neat)/cm1 3362, 2965, 2922, 2599, 1741, 1715, 1506, 1436, 1385, 1366, 1251, 1215, 1164, 1049 and 1025; **H (300 MHz; CDCl3; Me4Si) 1.47 (9 H, s, CMe3), 1.85-2.0 (2 H, m,  CH2), 2.10 (3 H, s, -CH3), 2.52 (2 H, t *J* 6.8, -CH2), 3.76 (3 H, s, OMe), 4.39-4.48 (1H, m, -CH), 5.14 (1H, d *J* 7.5, NH); **C (75.4 MHz; CDCl3; Me4Si) 15.5 (-CH3), 28.3 (C*Me3*), 29.9 (-CH3), 32.2 (-CH3), 52.4 (OMe), 65.8 (-CH), 80.0 (*C*Me3), 153.3 (CONH), 172.8 (*C*O2Me). The assignments were supported by the DEPT 135 technique.

***N*-*tert*-Butyloxycarbonyl-phenylalanine ethyl ester 4h**

**max(neat)/cm1 3380, 2984, 2921, 1807, 1714, 1690, 1517, 1442, 1387, 1365, 1333, 1244, 1164, 1115, 1071, 1020 and 856; H (300 MHz; CDCl3; Me4Si) 1.22 (3 H, t *J* 7.2, OCH2*CH3*), 1.42 (9H, s, C*Me3*), 3.1 (2H, tap *J* 6.6, CH2), 4,12 and 4.19 (2 H, 2 d *J* 7.2, O*CH2* CH3), 4.58 (1 H, d *J* 7.0, -CH), 5.10 (1 H, d *J* 7.0, NH), 7.7 (2 H, d *J* 7.2, Ar-H *ortho* CH2), 7.20-7.35 (3 H, m, Ar-H, *meta* and *para* CH2), **C (75.4 MHz; CDCl3; Me4Si) 14.1 (OCH2*CH3*), 28.2 (C*Me3*), 38.3 (-CH2), 54.4 (-CH), 61.2 (O*CH2*CH3), 79.8 (*C*Me3), 126.9 (C-4), 128.4 (C-3 and C-5), 129.3 (C-2 and C-6), 136.0 (C-1), 155.0 (*C*O2CMe3), 171.8 (*C*O2Et). The assignments were supported by the DEPT 135 technique;

**2-(*N,N-*Diethylamino)-*N’*-{3-[(*N,N*-dimethylaminophenyl)-4'-diazenyl]-benzoyl}-ethylamine 5**

**max(neat)/cm1 3585, 3451, 3267, 3055, 2977, 1638, 1604, 1538, 1520, 1450, 1403, 1371, 1278, 1203, 1154, 1120, 1103, 946 and 825; **H (300 MHz; CDCl3; Me4Si) 1.09 (6 H, t *J* 7.5, N(CH2*CH3*)2), 2.64 (4 H, q *J* 6.7, N(*CH2*CH3) 2), 2.72 (2 H, t *J* 5.3, CH2*CH2*NEt2), 3.10 (6 H, s, NMe2), 3.50-3.60 (2 H, m, *CH2*CH2NEt2), 6.76 (2 H, d *J* 9.0, 2 Ar-H *ortho* NMe2), 7.25 (1 H, br s, NH), 7.54 (1 H, t *J* 7.8, 5-H), 7.83-7.90 (3 H, 2 Ar-H *meta* NMe2, 6 or 4-H), 7.96 (1 H, d *J* 8.1, 4 or 6-H), 8.22 (1 H, tap *J* 1.8, 2-H); **C (75.4 MHz; CDCl3; Me4Si) 10.8 (N(CH2*C*H3)2), 36.7 (CH2*CH2*NEt2), 40.0 (NMe2), 46.6 [N(*C*H2CH3)2], 51.2 (*CH2*CH2NEt2), 111.1 (C'-2 and C'-6), 120.3 (C-2), 124.7 (C-4), 124.9 (C-3' and C-5'), 127.6 (C-5), 128.9 (C-6), 135.1 (C-1), 143.0 (C-4'), 152.3 (C-3), 152.8 (C-1'), 167.0 (CONH). The assignments were supported by the DEPT 135 technique.

***N*-(3-Aminobenzoyl)-alanine methyl ester 6c**

**max(neat)/cm1 3471, 3375, 2981, 2952, 2853, 1749, 1731, 1627, 1673, 1668, 1604, 1547, 1539, 1493, 1459, 1394, 1368, 1321, 1289, 1224, 1151, 1103, 1073, 1040, 995, 982, 950, 873, 822, 774, 747 and 526; **H (300 MHz, CDCl3; Me4Si) 1.20 (9 H, s, C(CH3) 3), 1.61 (3 H, d, *J* 7.2, -CH3 Ala), 3.77 (5 H, s, OCH3 and NH2), 5.08-5.18 (1 H, m, -CH Ala), 6.76-6.82 (1 H, m, 4-H), 6.89 (1 H, tap *J* 1.5, 2-H), 6.96 (1 H, dt, *J* 8.1, 1.2, 6-H), 7.18 (1 H, t *J* 8.4, 5-H); **C (75.4 MHz, CDCl3; Me4Si) 15.1 (-CH3 Ala), 27.3 (C*Me3*), 52.4 (-CH Ala), 53.3 (OCH3), 83.5 (*C*Me3), 113.7 (C-4), 117.6 (C-2), 117.7 (C-5), 128.6 (C-6), 138.3 (C-1), 146.4 (C-3), 152.6 (*C*O2CMe3), 171.5 (CONH) 173.4 (*C*O2CH3); The assignments were supported by the DEPT 45 technique;

***N*-(3-Aminobenzoyl)-phenylalanine ethyl ester 6h**

**max(neat)/cm1 3378, 2984, 2979, 1732, 1682, 1602, 1497, 1447, 1368, 1258, 1149, 1030, 886, 842 and 727. **H (300 MHz, CDCl3; Me4Si) 1.04 (9 H, s, CMe3), 1.30 (3 H, t *J* 7.0 , OCH2*CH3*), 3.40-3.60 (2 H, m*,* -CH2), 4,20- 4.35 ( 2H, m, O*CH2*CH3), 5.42-5.45 (1 H, 2 d *J* 6.9, -CH), 7.15 (1 H, d *J* 7.6, 4-H), 7.20-7.30 (6 H, m, 5-H and 5 Ar-H Phe), 7.40 (1 H, d *J* 7.6, 6-H), 7.45 (1 H, s, 2-H); **C (75.4 MHz, CDCl3; Me4Si) 14.2 (OCH2*C*H3), 27.2 (C*Me3*), 35.4 (-CH2), 58.7 (-CH), 61.6 (O*C*H2CH3), 83.3 (*C*Me3), 123.8 (C-2), 126.6 (C-6), 127.4 (C-4), 127.8 (C-4'), 128.5 (C-3' and C-5'), 129.5 (C-2' and C-6'), 130.9 (C-5), 137.5 (C-1' and C-1), 152.7 (*C*O2CMe3), 170.2 (CONH) 173.0 (*C*O2CH2CH3).

***N*-(3-Aminobenzoyl)-phenylalanine ethyl ester 7h**

**max(oil)/cm1 3477, 3388, 3326, 3032, 2923, 2853, 1756, 1621, 1579, 1519, 1494, 1464, 1456, 1373, 1354, 1326, 1303, 1270, 1207, 1181, 1143, 1109, 1095, 1016, 869 and 755; **H (300 MHz; CDCl3; Me4Si) 1.28 (3 H, t *J* 7.2, OCH2*CH3*), 3.18-3.32 (2 H, m, -CH2), 3.80 (2 H, br s, NH2 exchangeable with D2O), 4.22 (2 H, q *J* 6.9, O*CH2*CH3), 5.0-5.10 (1 H, m, -CH), 6.59 (1 H, d *J* 7.5, NH), 6.76-6.84 (1 H, m, 4 or 6-H), 7.0-7.36 (8 H, m, Ar-H, 2, 5-H and 4 or 6-H); The assignments were supported by spin decoupling-double ressonance. **C (75.4 MHz; CDCl3; Me4Si) 14.1 (OCH2*C*H3), 37.9 (-CH2), 53.5 (-CH), 61.6 (O*C*H2CH3), 113.7 (C-2), 116.5 (C-6), 118.1 (C-4), 127.1 (C-4), 128.5 (C-3 and C-5), 129.4 (C-2 and C-6), 129.5 (C-5), 135.1 (C-1), 135.9 (C-1), 167.0 (CONH), 171.6 (*C*O2CH2CH3). The assignments were supported by the DEPT 135 technique.

***N*-Benzyloxycarbonyl*--{*3-[(*N,N*-dimethylaminophenyl)-4'-diazenyl]-benzoyl}-lysine methyl ester 8**

**max(MeOH)/nm 445 (/dm3 mol1 cm1 26 150); **max(oil)/cm13279, 1720, 1710, 1692, 1632, 1599, 1529, 1507, 1461, 1376, 1300, 1207, 1142, 1115, 940, 820, 755, 722 and 678; **H (300 MHz; CDCl3; Me4Si) 1.40-2.0 (6 H, 3  m, -CH2), 3.09 (6 H, s, NMe2), 3.46-3.49 (2 H, m, -CH2), 3.74 (3 H, s, OMe), 4.35-4.40 (1 H, m, -CH), 5.07 (2 H, d *J* 4.5, *CH2* Z), 5.50 (1 H, d *J* 8.1, NH side chain), 6.51 (1 H, br s, NH), 6.74 (2H, d *J* 9.0, 2  Ar-H *ortho* NMe2), 7.32 (<5 H, s, 5  Ar-H Z), 7.95 (2 H, t *J* 8.1, 5-H and 6 or 4-H), 8.17 (1 H, s, 2-H), 7.84-7.90 (3 H, m, 2  Ar-H *meta* NMe2 and 4 or 6-H); The assignments were supported by spin decoupling-double ressonance. **C (75.4 MHz; CDCl3; Me4Si) 22.4 (-CH2) 28.8 (-CH2), 32.0 (-CH2) 39.5 (-CH2), 40.2 (NMe2), 52.3 (OMe), 53.5 (-CH), 66.9 (*C*H2 Z), 111.3 (C-2' and C-6'), 119.9 (C-2), 125.1 (C-3', C-5' and C-4), 127.9 (C-3 and C-5 Z), 128.0 (C-4 Z), 128.1 (C-5), 128.4 (C-2 and C-6 Z), 129.2 (C-6), 135.4 (C-1), 136.1 (C-1 Z), 143.3 (C-4'), 152.5 (C-3), 152.9 (C-1'), 167.3 (CONH), 172.8 (*C*O2Me). The assignments were supported by the DEPT 135 technique.

***N*-Benzyloxycarbonyl-*N,-*bis(*tert*-butyloxycarbonyl)-**-{3-[(*N,N*-dimethylaminophenyl)-4'-diazenyl]-benzoyl}-lysine methyl ester 9**

**max(MeOH)/nm 419 (/dm3 mol1 cm1 34 923); **H (300 MHz; CDCl3; Me4Si) 1.14 (9 H, s, CMe3 side chain), 1.46 (9 H, s, CMe3 main chain), 1.60-1.80 (2 H, m,  -CH2), 1.88-2.30 (4 H, 2  m, , -CH2), 3.10 (6 H, s, NMe2), 3,64 (3H, s, OMe), 3.80 (2 H, t *J* 7.3, -CH2), 4.90-5.0 (1 H, m, -CH), 5.25 (2 H, s, *C*H2 Z), 6.76 (2 H, d *J* 9.0, 2  Ar-H *ortho* NMe2), 7.30-7.57 (6 H, m, 5  Ar-H Z, 5-H), 7.88 (2 H, d *J* 8.7, 2  Ar-H *meta* NMe2), 7.92-7.98 (3 H, m, 4, 6 and 2-H); C (75.4 MHz; CDCl3; Me4Si) 23.7 (-CH2), 27.4 (C*Me3*), 27.8 (C*Me3*), 28.5 (-CH2), 29.6 (-CH2), 40.3 (NMe2), 45.5 (-CH2), 52.2 (OMe), 58.5 (-CH), 68.8 (CH2 Z), 83.1 (CMe3), 83.7 (CMe3), 111.4 (C-2' and C-6'), 120.6 (C-2), 125.0 (C-4), 125.1 (C-3' and C-5'), 128.0 (C-4 Z), 128.3 (C-3 and C-5 Z), 128.4 (C-5), 128.5 (C-2 and C-6 Z), 128.7 (C-6), 135.2 (C-1), 138.7 (C-1 Z), 143.4 (C-4'), 151.3 (C-3), 152.6 (C-1'), 153.3 (2  *C*O2CMe3), 153.7 (*C*ON-Boc), 170.9 (CONH), 172.7 (*C*O2Me). The assignments were supported by the DEPT 135 technique.

***N*-Benzyloxycarbonyl-*N-tert*-butyloxycarbonyl-**-{3-[(*N,N*-dimethylaminophenyl)-4'-diazenyl]-benzoyl}-lysine methyl ester 10**

**max(MeOH)/nm 410 (/dm3 mol1 cm1 23 478); **H (300 MHz; CDCl3; Me4Si) 1.44 (9 H, s, CMe3), 1.60-1.70 (2 H, m, -CH2), 1.90-2.0 and 2.10-2.28 (4 H, 2 m,  and -CH2), 3.02 (6 H, s, NMe2), 3.40-3.52 (2 H, m, -CH2), 3,66 (3H, s, OMe), 4.92-5.0 (1 H, m, -CH), 5.18-5.28 (2 H, m, CH2 Z), 6.32 (1 H, tap *J* 4.7, NH), 6.76 (2 H, d *J* 9.3, 2 Ar-H *ortho* NMe2), 7.27-7.40 (5 H, m, 5 Ar-H Z), 7.54 (1 H, t *J* 8.1, 5-H), 7.84 (1 H, d *J* 8.1, 4 or 6-H), 7.90 (2 H, d *J* 9.0, 2 Ar-H *meta* NMe2), 7.95 (1 H, dt *J* 8.1, 6 or 4-H), 8.15 (1 H, tap *J* 1.8, 2-H); **C (75.4 MHz; CDCl3; Me4Si) 23.6 (-CH2), 27.8 (C*Me3*), 29.1 (-CH2), 29.4 (-CH2), 39.8 (-CH2), 40.3 (NMe2), 52.2 (OMe), 58.2 (-CH), 68.9 (*C*H2 Z), 83.8 (*C*Me3), 111.4 (C-2' and C-6'), 119.7 (C-2), 125.2 (C-3', C-5' and C-4), 128.0 (C-4 Z), 128.3 (C-3 and C-5 Z), 128.4 (C-5), 128.5 (C-2 and C-6 Z), 129.3 (C-6), 135.1 (C-1), 135.5 (C-1 Z), 143.4 (C-4'), 151.3 (C-3), 152.6 (C-1'), 153.0 (*C*O2CMe3), 153.9 (*C*ON-Boc) 167.1 (CONH), 170.9 (*C*O2Me). The assignments were supported by the DEPT 135 technique.

***N,*-Bis(*tert*-butyloxycarbonyl-lysine methyl ester 11**

**H (300 MHz; CDCl3; Me4Si) 1.28-1.88 (24 H, 4 m, 2 CMe3, -CH2), 3.10 (2 H, d *J* 6.3, -CH2), 3.73 (3 H, s, OMe), 4.22-4.32 (1 H, m, -CH), 4.60 (1 H, br s, NH), 5.05 (1 H, br s, NH); **C (75.4 MHz; CDCl3; Me4Si) 22.4 (-CH2), 28.3 (*Me3*C), 28.4 (*Me3*C), 29.5 -CH2), 32.3 (-CH2), 40.0 (-CH2), 52.2 (OMe), 53.2 (-CH), 79.1 (Me3*C*), 79.8 (Me3*C*), 155.4 (2xCONH), 156.0 (CONH), 173.2 (*C*O2Me). The assignments were supported by the DEPT 135 technique.

***N*-Benzyloxycarbonyl*--{*3-[(*N,N*-dimethylaminophenyl)-4'-diazenyl]-benzoyl}-lysine 12**

**H (300 MHz; CDCl3; Me4Si) 1.38-1.50 (2 H, m, -CH2), 1.52-1.68 (2 H, m, -CH2), 1,69-1,98 (2 H, 2 m, -CH2), 3.07 (6 H, s, NMe2), 3.30-3.50 (2 H, m, -CH2), 4.32-4.43 (1 H, m, -CH), 5.04 (2 H, s, CH2 Z), 5.78 (1 H, d *J* 6.9, NH main chain), 6.72 (3 H, d *J* 9.3, 2 Ar-H *ortho* NMe2 and NH side chain), 7.28 (5 H, s, 5 ArH Z), 7.48 (1 H, t *J* 7.8, 5-H), 7.80**-**7.97 (4 H, m, 2 Ar-H *meta* NMe2, 4 and 6-H), 8.20 (1 H, s, 2-H). The assignments were supported by spin decoupling-double ressonance. **C(75.4 MHz; CDCl3; Me4Si) 22.2 (-CH2), 28.7 (-CH2), 31.8 (-CH2), 39.7 (-CH2), 40.2 (NMe2), 53.6 (-CH), 66.9 (CH2 Z), 111.4 (C-2' and C-6'), 119,9 (C-2), 125.2 (C-3' and C-5'), 125.3 (C-4), 127,9 (C-3 and C-5 Z), 128.0 (C-4 Z), 128.2 (C-5), 128.4 (C-2 and C-6 Z), 129.3 (C-6), 135.1 (C-1), 136.2 (C-1 Z), 143.3 (C-4'), 152.6 (C-3), 152.9 (C-1'), 156.3 (*C*ONH Z), 167.8 (*C*ONH side chain), 175.2 (CO2H). The assignments were supported by the DEPT 135 technique.

***N*-Benzyloxycarbonyl*--{*3-[(*N,N*-dimethylaminophenyl)-4'-diazenyl]-benzoyl}-lysyl-alanine methyl ester 13c**

**max(MeOH)/nm 421 (/dm3 mol1 cm1 24 473); **H (300 MHz; CDCl3; Me4Si) 1.39 (3 H, t *J* 7.7, CH3 Ala), 1.41-1.56 (2 H, m, -CH2 Lys), 1.70-2.0 (4 H, 2 m, and -CH2 Lys), 3.11 (6 H, s, NMe2), 3.42-3.60 (2 H, m, -CH2 Lys), 3.68 (3 H, s, OCH3), 4.16-4.24 (1 H, m, -CH Lys), 4.55 (1 H, t *J* 7.2, -CH Ala), 5.08 (2 H, d *J* 4.2 CH2 Z), 5.64 (1 H, d *J* 7.8, NH main chain), 6.63 (1 H, s br, NH Lys side chain), 6.70 (1 H, s br, NH Ala), 6.76 (2 H, d *J* 9.0, *ortho* NMe2), 7.67-7.70 (5 H, m, 5 Ar-H Z and 5 Ar-H Z), 7.51 (1 H, t *J* 7.8, 5-H), 7.80-7.92 (3 H, m, 2 Ar-H *meta* NMe2 and 6 or 4-H), 7.95 (1 H, d *J* 7.8, 4 or 6-H), 8.16 (1 H, s, 2-H). The assignments were supported by spin decoupling-double ressonance. **C (75.4MHz; CDCl3; Me4Si) 17.9 (*C*H3 Ala), 22.1 (-CH2 Lys), 28.9 (-CH2 Lys), 32.0 (-CH2 Lys), 39.2 (-CH2 Lys), 40.3 (NMe2), 48.1 (-CH Ala), 52.5 (OCH3), 54.4 (-CH Lys), 67.0 (CH2 Z), 111.4 (C-2' and C'-6), 120.0 (C-2), 125.2 (C-3' and C-5'), 128.0 (C-4 and C-4 Z), 128.1 (C-3 and C-5 Z), 128.2 (C-5), 128.5 (C-2 and C-6 Z), 129.2 (C-6), 135.4 (C-1), 136.2 (C-1 Z), 143.4 (C-4'), 152.6 (C-3), 153.0 (C-1'), 156.3 (*C*ONH Z), 167.5 (CONH), 171.4 (CONH), 173.1 (*C*O2CH3). The assignments were supported by the DEPT 135 technique.

***N*-Benzyloxycarbonyl*--{*3-[(*N,N*-dimethylaminophenyl)-4'-diazenyl]-benzoyl}-lysyl-phenylalanine ethyl ester 13h**

**max(MeOH)/nm 417 (/dm3 mol1 cm1 23 989); **H (300 MHz; CDCl3; Me4Si) 1.19 (3 H, t *J* 7.5, OCH2*CH3*), 1.36-1.50 (2 H, m, -CH2 Lys), 1.60-1.80 (2 H, m, -CH2 Lys), 1.81-2.0 (2 H, m, -CH2 Lys), 3.0-3.10 (2 H, m, -CH2 Phe), 3.11 (6 H, s, NMe2), 3.40-3.54 (2 H, m, -CH2 Lys), 4.11 (2 H, q *J* 7.0, O*CH2*CH3), 4.76-4.86 (1 H, m, -CH Phe), 5.07 (2 H, s, CH2 Z), 5.51 (2 H, d *J* 7.8, NH main chain, -CH Lys), 6.42-6.56 (2 H, m, NH Lys side chain, NH Phe), 6.76 ( 2H, d *J* 9.3, 2 Ar-H *ortho* NMe2), 7.10 (2 H, d *J* 7.2, 2 Ar-H Phe), 7.14-7.36 (8 H, m, 3 Ar-H Phe, 5 Ar-H Z), 7.49 (1 H, t *J* 8.1, 5-H), 7.82-7.92 (3 H, m, 2 Ar-H *meta* NMe2, 6 or 4-H), 7.96 (1 H, d *J* 7.8, 4 or 6-H), 8.17 (1 H, tap *J* 2.1, 2-H). The assignments were supported by spin decoupling-double ressonance; C (75.4 MHz; CDCl3; Me4Si) 14.0 (OCH2*C*H3), 22.2 (-CH2 Lys), 28.8 (CH2 Lys), 31.8 (-CH2 Lys), 37.7 (-CH2 Phe), 39.2 (-CH2 Lys), 40.2 (NMe2), 53.2 (-CH Phe), 54.5 (-CH Lys), 61.5 (O*C*H2CH3), 66.9 (CH2 Z), 111.4 (C-2' and C'-6), 120.1 (C-2), 125.0 (C-4), 125.1 (C-3' and C-5'), 126.9 (C-4" and C-4 Z), 127.0 (C-5), 127.9 (C-3", C-5" and C-3, C-5 Z), 128.1 (C-6), 128.4 (C-2 and C-6 Z), 129.2 (C-2" and C-6"), 135.4 (C-1), 135.7 (C-1"), 136.2 (C-1 Z), 143.3 (C-4'), 152.6 (C-3), 153.0 (C-1'), 156.2 (CONH Z), 167.4 (CONH), 171.3 (CONH Phe), 171.4 (*C*O2CH2CH3). The assignments were supported by the DEPT 135 technique.

**Methyl 3-[(*N,N*-dimethylaminophenyl)-4'-diazenyl]-benzoate 14**

**max(MeOH)/nm 420 (/dm3 mol1 cm1 22 991); **max(neat)/cm13438, 1723, 1608, 1556, 1450, 1445, 1392, 1280, 1208, 802 and 752; **H (300 MHz; CDCl3; Me4Si) 3.32 (6 H, s, NMe2), 3.98 (3 H, s, OMe), 7.42 (2 H, br s, 2  Ar-H *ortho* NMe2), 7.60 (1 H, t *J* 8.1, 5-H), 8.12 (1 H, d *J* 7.8, 4 or 6-H), 8.48 (3 H, d *J* 6.82, 2 Ar-H *meta* NMe2 and 6 or 4-H), 8.66 (1H, s, 2-H);**C (75.4 MHz; CDCl3; Me4Si) 40.2 (NMe2), 52.2 (OMe), 111.4 (C-2' and C-6'), 123.3 (C-2), 125.2 (C-3' and C-5'), 126.4 (C-4), 129.0 (C-5), 130.0 (C-1), 131.0 (C-6), 143.4 (C-4'), 152.6 (C-3), 153.2 (C-1'), 166.8 (*C*O2Me). The assignments were supported by the Dept 45 technique.
